1 **Increased prefrontal activity with aging reflects nonspecific neural responses rather**  
2 **than compensation**

3

4 Alexa M. Morcom<sup>1</sup>

5 Richard N. A. Henson<sup>2</sup>, for Cambridge Centre for Ageing and Neuroscience<sup>3</sup>

6 <sup>1</sup>Centre for Cognitive Ageing and Cognitive Epidemiology, University of Edinburgh, United  
7 Kingdom

8 <sup>2</sup>MRC Cognition and Brain Sciences Unit, Cambridge CB2 3EB, United Kingdom

9 <sup>3</sup>Cambridge Centre for Ageing and Neuroscience (Cam-CAN), University of Cambridge and  
10 MRC Cognition and Brain Sciences Unit, Cambridge CB2 3EB, United Kingdom

11

12 Alexa M. Morcom can be contacted at: alexa.morcom@ed.ac.uk

13

14 No. of Figures = 3

15 No. of Tables = 2

16 No multimedia/ extended data

17

18

19 Abstract

20 Elevated prefrontal cortex activity is often observed in healthy older adults despite declines  
21 in their memory and other cognitive functions. According to one view, this activity reflects a  
22 compensatory functional posterior-to-anterior shift, which contributes to maintenance of  
23 cognitive performance when posterior cortical function is impaired. Alternatively, the  
24 increased prefrontal activity may be less specific, reflecting reduced dedifferentiation or  
25 reduced efficiency of neuronal responses due to structural and neurochemical changes  
26 accompanying aging. These accounts are difficult to distinguish on the basis of average  
27 activity levels within brain regions. Instead, we used a novel model-based multivariate  
28 analysis technique, applied to functional magnetic resonance imaging data from an adult-  
29 lifespan human sample (N=123; 66 female). Standard analysis replicated the age-related  
30 increase in average prefrontal activation during memory encoding, but multivariate tests  
31 revealed that this activity did not carry additional information. Indeed, direct tests of the  
32 relative contributions of anterior and posterior regions to memory indicated reduced reliance  
33 on prefrontal cortex with increasing age. The results contradict the posterior-to-anterior shift  
34 hypothesis, suggesting reduced specificity rather than compensation.

35 Significance statement

36 Functional brain imaging studies have often shown increased activity in prefrontal brain  
37 regions in older adults. This has been proposed to reflect a compensatory shift to greater  
38 reliance on prefrontal cortex, helping to maintain cognitive function. Alternatively, activity  
39 may become less specific as people age. This is a key question in the neuroscience of  
40 aging. In this study, we used novel tests of how different brain regions contribute to memory  
41 for events. We found increased activity in prefrontal cortex in older adults, but this activity  
42 carried less information about memory outcomes than activity in visual regions. These  
43 findings are relevant for understanding why cognitive abilities decline with age, suggesting  
44 that optimal function depends on successful brain maintenance rather than compensation.

45

46

47

48

## 49 Introduction

50 It is well established that healthy aging is associated with a decline in cognitive processes  
51 like memory, but mechanistic explanation of this decline is impeded by difficulties in  
52 interpreting the underlying brain changes. Functional magnetic resonance imaging (fMRI) of  
53 such cognitive processes shows striking increases, as well as decreases, in brain activity of  
54 older relative to younger adults. One leading theory – the Posterior-to-Anterior Shift in Aging  
55 (PASA) – states that compensatory recruitment of anterior regions like prefrontal cortex  
56 (PFC) contribute to maintenance of cognitive performance when posterior cortical function is  
57 impaired (Davis et al., 2008; Park and Reuter-Lorenz, 2009; Grady, 2012). Alternatively,  
58 age-related increases in PFC activity may reflect reduced specificity of neuronal responses,  
59 reflecting primary age-related changes within PFC (Park et al., 2004; Nyberg et al., 2012). It  
60 is difficult to adjudicate between these theories based on average activity levels within brain  
61 regions (Morcom and Johnson, 2015). We used a novel multivariate approach to directly test  
62 predictions of the PASA theory.

63 With multivariate methods that examine distributed patterns of brain activity over many  
64 voxels, one can ask whether increased anterior activity provides additional information,  
65 beyond that carried by posterior cortical regions. Such complementary information would  
66 support theories like PASA that attribute additional PFC recruitment to compensatory  
67 mechanisms. We used a model-based decoding approach called multivariate Bayes (MVB)  
68 (Friston et al., 2008; Morcom and Friston, 2012; Chadwick et al., 2014), which estimates the  
69 patterns of activity that best predict a target cognitive outcome. Importantly, MVB allows  
70 formal comparison of models comprising different brain regions, such as PFC, posterior  
71 cortex, or their combination.

72 In this study, we applied MVB to fMRI data from a memory encoding paradigm in a  
73 population-derived, adult-lifespan sample (N=123, 19-88 years; Shafto et al. 2014).  
74 Participants were scanned while encoding new memories of unique pairings of objects and  
75 background scenes, and the target cognitive outcome was whether or not these associations  
76 were subsequently remembered (Fig 1). A previous behavioral study in an independent  
77 sample showed a strong decline in such associative memory across the adult lifespan  
78 (Henson et al., 2016). We defined two regions-of-interest (ROIs): posterior visual cortex  
79 (PVC), comprising lateral occipital and fusiform cortex, and PFC, comprising ventrolateral,  
80 dorsolateral, superior and anterior regions (Fig 2a). These ROIs were based on previous  
81 fMRI studies of memory encoding, and those cited in the context of the PASA theory (Davis  
82 et al., 2008; Maillet and Rajah, 2014).

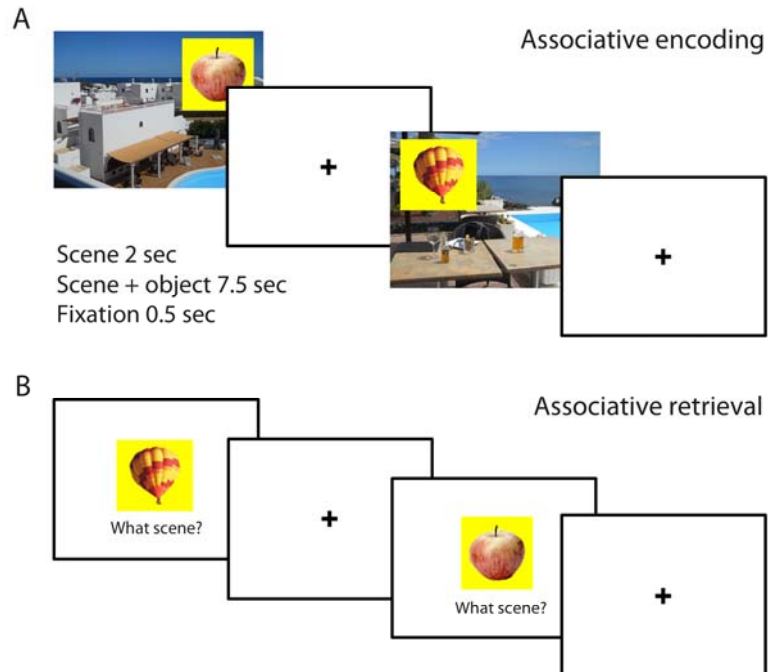

83

84 **Figure 1.** Associative encoding task. In the scanned Study phase, participants were asked to make  
85 up a story that linked each object with its background scene (120 trials total). On each trial, the scene  
86 was presented for 2 sec, then the object superimposed for 7.5 sec, finally the screen was blanked for  
87 0.5 sec before the next trial. At Test (out of the scanner), each object was presented again, and after  
88 a measure of priming, item memory and background valence memory, participants were asked to  
89 verbally describe the scene with which it was paired at Study. The latter verbal recall was scored as  
90 correct or incorrect, which was then used to classify the trials at Study into “remembered” and  
91 “forgotten” (see text for details).

92

## 93 Materials and Methods

### 94 Participants

95 A healthy, population-derived adult lifespan human sample (N=123; 19-88 years; 66 female)  
96 was collected as part of the Cam-CAN study (Shafto et al., 2014). Participants were fluent  
97 English speakers in good physical and mental health. Exclusion criteria included a low Mini  
98 Mental State Examination (MMSE) score ( $\leq 24$ ), serious current medical or psychiatric  
99 problems, or poor hearing or vision, as well as standard MRI safety criteria. Two participants  
100 were excluded from the current analysis as subsequent memory could not successfully be  
101 decoded from either region of interest (see Multivariate Bayesian decoding). Two further  
102 participants were excluded because of statistical outlier values in the analysis of univariate  
103 subsequent memory effects (see Statistics for criteria). The experiment used a within-

104 participant design, so all participants received all the task conditions. Therefore,  
105 randomization and blinding were not required. The study was approved by the  
106 Cambridgeshire 2 (now East of England—Cambridge Central) Research Ethics Committee.  
107 Participants gave informed written consent.

## 108 **Materials**

109 Stimuli were 160 pictures of everyday emotionally-neutral objects taken from (Smith et al.,  
110 2004). For the study phase, objects were presented within a square yellow background on  
111 one of 120 scenes from the IAPS emotional pictures database (Lang et al., 1997). Scenes  
112 were grouped into 40 per valence (positive, neutral, negative), selected based on a pilot  
113 study, with the same randomized trial order for each valence condition for all participants. To  
114 control for stimulus effects, the 160 objects were divided randomly into 4 sets, and the  
115 allocation of object sets to scene valence rotated across participants in 4 different  
116 counterbalances (see (Henson et al., 2016) for further details).

## 117 **Behavioral procedure**

118 The behavioural paradigm is summarized in Figure 1. The scanned study phase comprised  
119 120 trials, presented in two 10 min blocks separated by a short break. On each study trial, a  
120 background scene was first presented for 2 sec, and an object then superimposed for 7.5  
121 sec, slightly above center and either to the left or right. Participants were asked to create a  
122 story that linked the object to the scene, to press a button when they had made the story,  
123 and to continue to elaborate it until the scene and object disappeared. A blank screen of 0.5  
124 sec was then presented prior to the next trial. Participants were informed that the task would  
125 include some pleasant and unpleasant scenes. They were not told that their memory would  
126 be tested later. A practice session of 6 study trials was given just beforehand.

127 The test phase took place outside the scanner, following a short break of approximately 10  
128 min involving refreshment and conversation with the experimenter. The 120 objects from the  
129 study phase were presented again, randomly intermixed with 40 new objects, and divided  
130 into 4 blocks lasting approximately 20 min each. The first stage of each test involved a  
131 priming measure: the masked version of the object was presented in the center of the  
132 screen, and participants were asked to identify it, making a keypress response and at the  
133 same time either naming the object aloud or saying “don’t know”. Next, item memory was  
134 tested by removing the pixel-noise and asking participants to judge whether the object had  
135 appeared in the study phase and to indicate their level of confidence in this judgement by  
136 pressing one of four keys: “sure new”, “think new”, “think studied”, “sure studied”. They were  
137 told that about one quarter of objects were new. Associative memory was then tested for all

138 items judged “studied” (“think” or “sure”), by asking participants to state aloud the type of  
139 background the object had been studied with (positive, neutral, or negative, or “don’t know”).

140 Lastly, and relevant to the present study, participants were asked to verbally describe the  
141 scene that had been paired with the test object at study. Trials at study in which scenes that  
142 were correctly recalled at test, in terms of detail or gist, were scored as “remembered”,  
143 whereas study trials for which the scenes could not be recalled, or for which an incorrect  
144 scenes was described instead, or for which the object was not recognised, were scored as  
145 “forgotten”. Split by age tertile, the mean numbers of trials (SD) for Remembered and  
146 Forgotten trials were 55 (25) and 65 (25) for young adults (19-45 years; n=38), 44 (24) and  
147 76 (24) for middle aged adults (46-64 years; n=43), and 23 (15) and 97 (15) for older adults  
148 (65-88 years; n=42).

149 As expected, regression against age showed that the number of remembered trials  
150 decreased with age (linear  $t(120)=-8.06$ ,  $P<.001$ ; with no significant quadratic component,  
151  $t(120)=-0.50$ ,  $P=.62$ ); two-tailed tests.

## 152 **Imaging data acquisition and preprocessing**

153 The MRI data were collected using a Siemens 3 T TIM TRIO system (Siemens, Erlangen,  
154 Germany). MR data preprocessing and univariate analysis used the SPM12 software  
155 (Wellcome Department of Imaging Neuroscience, London, UK, [www.fil.ion.ucl.ac.uk/spm](http://www.fil.ion.ucl.ac.uk/spm)),  
156 release 4537, implemented in the AA 4.0 pipeline  
157 (<https://github.com/rhodricusack/automaticanalysis>).

158 The functional images were acquired using T2\*-weighted data from a Gradient-Echo Echo-  
159 Planar Imaging (EPI) sequence. A total of 320 volumes were acquired in each of the 2 Study  
160 sessions, each containing 32 axial slices (acquired in descending order), slice thickness of  
161 3.7 mm with an interslice gap of 20% (for whole brain coverage including cerebellum; TR  
162 =1970 milliseconds; TE =30 milliseconds; flip angle =78 degrees; FOV =192 mm x 192 mm;  
163 voxel-size =3 mm x 3 mm x 4.44 mm). A structural image was also acquired with a T1-  
164 weighted 3D Magnetization Prepared RApid Gradient Echo (MPRAGE) sequence (repetition  
165 time (TR) 2250ms, echo time (TE) 2.98 ms, inversion time (TI) 900 ms, 190 Hz per pixel; flip  
166 angle 9 deg; field of view (FOV) 256 x 240 x 192 mm; GRAPPA acceleration factor 2).

167 The structural images were rigid-body registered with an MNI template brain, bias-corrected,  
168 segmented and warped to match a gray-matter template created from the whole CamCAN  
169 Stage 3 sample (N=272) using DARTEL (Ashburner, 2007) (see Taylor *et al.*, 2015) for more  
170 details). This template was subsequently affine-transformed to standard Montreal  
171 Neurological Institute (MNI) space. The functional images were then spatially realigned,

172 interpolated in time to correct for the different slice acquisition times, rigid-body coregistered  
173 to the structural image and then transformed to MNI space using the warps and affine  
174 transforms from the structural image, and resliced to 3x3x3mm voxels.

### 175 **Regions of interest (ROIs)**

176 ROIs were defined using WFU PickAtlas (<http://fmri.wfubmc.edu/>, version 3.0.5) with AAL  
177 and Talairach atlases (Lancaster et al., 2000; Tzourio-Mazoyer et al., 2002; Maldjian et al.,  
178 2003). The posterior visual cortex (PVC) mask comprised bilateral lateral occipital cortex and  
179 fusiform cortex (from AAL, fusiform and middle occipital gyri), and the PFC mask comprised  
180 bilateral ventrolateral, dorsolateral, superior and anterior regions (from AAL, the inferior  
181 frontal gyrus, both pars triangularis and pars orbitalis; middle frontal gyrus, lateral part;  
182 superior frontal gyrus, medial part; and from Talairach, Brodmann Area 10, dilation factor =  
183 1).

### 184 **Univariate imaging analysis**

185 For each participant, a General Linear Model (GLM) was constructed, comprising three  
186 neural components per trial: 1) a delta function at onset of the background scene, 2) an  
187 epoch of 7.5 seconds which onset with the appearance of the object (2s after onset of  
188 scene) and offset when both object and scene disappeared, and 3) a delta function for each  
189 keypress. Each neural component was convolved with a canonical haemodynamic response  
190 function (HRF) to create a regressor in the GLM. The scene onset events were split into  
191 three types (i.e, three regressors) according to the valence of the scene on each trial, while  
192 the keypress events were modelled by the same regressor for all trials (together, these four  
193 regressors served to model trial-locked responses that were not of interest). The responses  
194 of interest were captured by the epoch neural component, during which participants were  
195 actively relating the scene and object (see Behavioral Procedure). This epoch component  
196 was split into 6 types (regressors) according to the three scene valences and the two types  
197 of subsequent memory. Six additional regressors representing the 3 rigid body translations  
198 and rotations estimated in the realignment stage were included to capture residual  
199 movement-related artifacts. Finally the data were scaled to a grand mean of 100 over all  
200 voxels and scans within a session.

201 The GLM was fit to the data in each voxel. The autocorrelation of the error was estimated  
202 using an AR(1)-plus-white-noise model, together with a set of cosines that functioned to  
203 highpass the model and data to 1/128 Hz, fit using Restricted Maximum Likelihood (ReML).  
204 The estimated error autocorrelation was then used to “prewhiten” the model and data, and  
205 ordinary least squares used to estimate the model parameters. To compute subsequent  
206 memory effects, the parameter estimates for the 6 epoch components were averaged across

207 the two sessions and the three valences (weighted by number of trials per session/valence),  
208 and contrasted directly as remembered minus forgotten (Morcom et al., 2003; Maillet and  
209 Rajah, 2014). Univariate statistical analyses were conducted on the mean subsequent  
210 memory effect across all voxels in the MVB analysis, in each ROI for each participant (see  
211 next section).

## 212 **Multivariate Bayesian decoding**

213 A series of MVB decoding models were fit to assess the information about subsequent  
214 memory carried by individual ROIs or combinations of ROIs. MVB estimates the free energy,  
215 which provides an upper bound on the Bayesian log-evidence. The evidence for different  
216 models can then be compared, or the fitted model weights examined to assess their  
217 distribution over voxels and the contributions of different voxels. These analyses were  
218 implemented in SPM12 v6486 and custom MATLAB scripts.

219 MVB maps many physiological data features (the predictor variables are formed from fMRI  
220 activity in multiple voxels) to a psychological target variable. Each MVB decoding model is  
221 based on the same design matrix of experimental variables used in the above univariate  
222 GLM. The target variable is specified as a contrast, in this case subsequent memory.  
223 Modelled confounds in the design (all covariates apart from those involved in the target  
224 contrast) are removed from both target and predictor variables. Each MVB model is fit using  
225 hierarchal parametric empirical Bayes, specifying empirical priors on the data features  
226 (voxel-wise activity) in terms of patterns over voxel features and the variances of the pattern  
227 weights. Since decoding models operating on multiple voxels (relative to scans) are ill-  
228 posed, these priors on the patterns of voxel weights act as constraints in the second level of  
229 the hierarchical model. MVB also uses an overall sparsity (hyper) prior in pattern space  
230 which embodies the expectation that a few patterns make a substantial contribution to the  
231 decoding and most make a small contribution. The pattern weights specifying the mapping of  
232 data features to the target variable are optimised with a greedy search algorithm using a  
233 standard variational scheme (Friston et al., 2007). In this work we used a sparse spatial  
234 prior, in which each pattern is an individual voxel (Morcom and Friston, 2012; Chadwick et  
235 al., 2014; Hulme et al., 2014; Maass et al., 2014) (log evidence was substantially greater for  
236 sparse than spatially smooth priors in both ROIs: for 1-tailed t-tests comparing to population  
237 mean=3, in PVC,  $t=4.65$ ,  $p<.001$  and PFC,  $t=6.91$ ,  $p<.001$ ,  $n=119$ ).

238 Features (voxels) for MVB analysis were selected using an orthogonal contrast and a leave-  
239 one-participant-out scheme. For each participant and ROI, these were the 1000 voxels with  
240 the strongest responses to the 6 epoch regressors in the above GLM (defined using an F  
241 contrast in all other participants testing variance explained by these regressors, regardless



242 of valence or subsequent memory). We then checked that subsequent memory could  
243 reliably be decoded from the selected features by contrasting the evidence for each model  
244 with the evidence for models in which the design matrix (and therefore the target variable)  
245 had been randomly phase-shuffled, taking the mean over 20 repetitions. This difference in  
246 log-evidence corresponds to the log (marginal) likelihood ratio or log Bayes factor for  
247 comparing the real and phase-shuffled models. Log evidence was robustly greater for real  
248 than shuffled models in both PVC ( $t=7.96$ ,  $p<.0001$ , mean difference = 12.7,  $SE=1.60$ ; two-  
249 tailed,  $n=119$ ) and PFC ( $t=10.5$ ,  $p<.0001$ , mean difference = 18.7,  $SE=1.78$ ; two-tailed,  
250  $n=119$ ).

251 Unlike univariate activation measures such as subsequent memory effects, but like other  
252 pattern-information methods, MVB finds the best non-directional model of activity predicting  
253 the target variable, so positive and negative pattern weights are equally important.  
254 Therefore, the principle MVB measure of interest for each ROI was the spread (standard  
255 deviation) of the weights over voxels, reflecting the degree to which multiple voxels carried  
256 substantial information about subsequent memory. We also constructed two novel measures  
257 of the contribution of prefrontal cortex to subsequent memory. The first used Bayesian model  
258 comparison within participants to test whether a joint PVC-PFC model boosted prediction of  
259 subsequent memory relative to a PVC-only model. The PASA hypothesis, in which PFC is  
260 engaged to a greater degree in older age and this contributes to cognitive outcomes,  
261 predicts that a boost will be more often observed with increasing age. The initial dependent  
262 measure was the log model evidence, coded categorically for each participant to indicate the  
263 outcome of the model comparison. The 3 possible outcomes were: a boost to model  
264 evidence for PVC-PFC relative to PVC models, i.e., better prediction of subsequent memory  
265 (difference in log evidence > 3), equivalent evidence for the two models ( $-3 < \text{difference in}$   
266  $\text{log evidence} < 3$ ), or a reduction in prediction of subsequent memory for PFC-PVC relative  
267 to PVC (difference in log evidence < -3). The second novel measure of PFC contribution to  
268 subsequent memory was the proportion of top-weighted voxels in the joint PVC-PFC model  
269 that were located in PFC, as opposed to PVC, derived from joint PVC-PFC models. In each  
270 participant, the voxels making the strongest contribution to subsequent memory, defined as  
271 those with absolute voxel weight values greater than 2 standard deviations from the mean,  
272 were divided according to their anterior versus posterior location. The dependent measure  
273 was the proportion of these top voxels located in PFC.

## 274 **Experimental design and statistical analysis**

275 Sample size was determined by the initial considerations of Stage 3 of the CamCAN study –  
276 see Shafto et al.(Shafto et al., 2014) for details. For this secondary data analysis study, a  
277 sensitivity analysis indicated that with  $N=123$ , we would have 80% power to detect a small to

278 medium effect explaining 7.4% of the variance ( $r^2=.074$ ). In our previous report of aging and  
279 successful memory encoding, an *a priori* test of a between-region difference in subsequent  
280 memory effects according to age showed a large effect ( $r^2=.257$ ) (Morcom et al., 2003).

281 Age effects on continuous multivariate or univariate dependent measures were tested using  
282 robust second-order polynomial regression with “rlm” in the package MASS for R (Venables  
283 et al., 2002); MASS version 7.3-45; R version 3.3.1) and standardized linear and quadratic  
284 age predictors. Analysis of outcomes of the between-region MVB model comparison (PVC  
285 and PFC combined versus PVC, see Fig 2 and main text) used ordinal regression with “polr”  
286 in MASS. Distributions were also trimmed to remove extreme outliers (> 5 SD above or  
287 below the mean). The two participants (aged 72 and 80) with outlier values for univariate  
288 effects were also removed from the MVB analyses so the samples examined were  
289 comparable. Finally, we excluded two further participants (aged 68 and 83) in whom  
290 subsequent memory could not be decoded from at least one of the two ROIs (log model  
291 evidence  $\leq 3$ ), giving  $n=119$ . All tests were two-tailed and used an alpha level of .05.

292 Where it was important to test for evidence for the null hypothesis over an alternative  
293 hypothesis, we supplemented null-hypothesis significance tests with Bayes Factors  
294 (Wagenmakers, 2007; Rouder et al., 2009). The Bayes Factors were estimated using  
295 Dienes’ online calculator (Dienes, 2014) which operationalizes directional hypotheses such  
296 as PASA in terms of a half-normal distribution. Here, as the regression betas were  
297 standardized, the half-normal distribution had mean=0 and SD=1.

## 298 Results

299 Standard univariate activation analyses assessed mean activity in each ROI across all  
300 voxels included in the multivariate analysis (see Materials and Methods). These confirmed  
301 that activity in both ROIs positively predicted subsequent memory across the lifespan (PVC:  
302  $t(118) = 4.42$ ,  $p < .001$ ; PFC:  $t(118) = 2.13$ ,  $p = .035$ ). Consistent with the PASA account,  
303 PFC activity increases for subsequently remembered versus forgotten items also became  
304 more pronounced with age, particularly in later years (for linear effect of age,  $t(118) = 2.43$ ,  
305  $p=.017$ ; for quadratic effect of age,  $t(118) = 2.58$ ,  $p = .012$ ) (Fig 2b). Age effects in PVC were  
306 not significant, though there was also no evidence that age effects in the two ROIs differed  
307 (see Table 1).

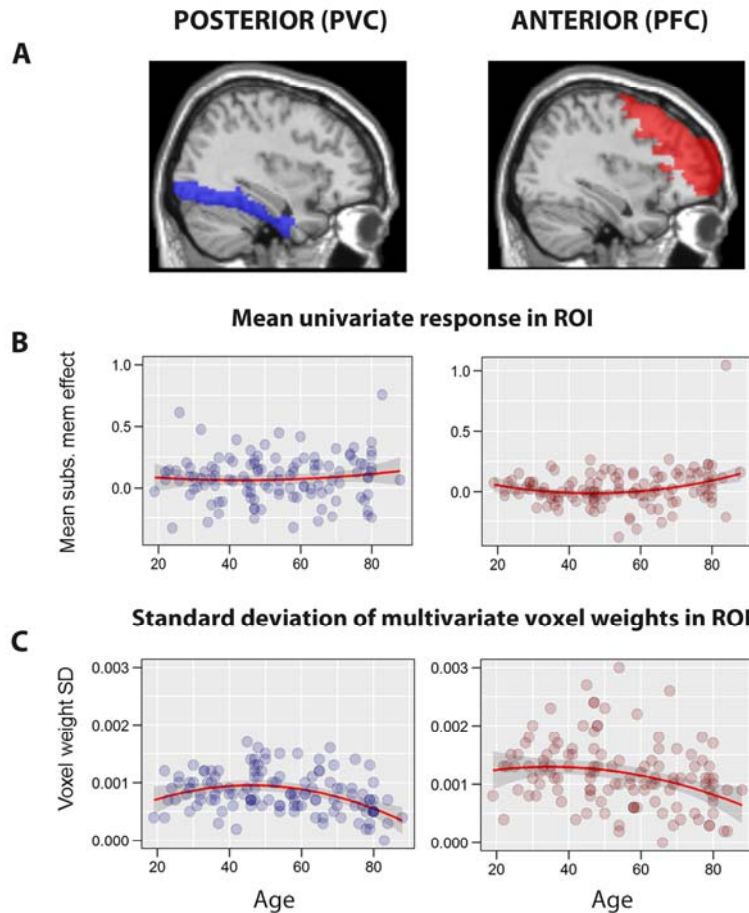

308

309 **Figure 2.** Relationship between age and subsequent memory effects within ROIs. **(a)** PVC (blue) and  
 310 PFC (red) ROIs overlaid on sagittal section ( $x=+36$ ) of a canonical T1 weighted brain image. **(b).**  
 311 Univariate subsequent memory effects (mean activity for remembered - forgotten), showing increased  
 312 activity with age in PFC but not PVC. **(c).** Spread of multivariate responses predicting subsequent  
 313 memory (standard deviation of fitted MVB voxel weights), showing reduced spread of responses with  
 314 age in both ROIs. Red and blue lines are robust-fitted second-order polynomial regression lines and  
 315 shaded areas show 95% confidence intervals.

316

| ROI/ measure | Linear   |             |          | Quadratic |      |       |
|--------------|----------|-------------|----------|-----------|------|-------|
|              | <i>t</i> | $R^2_{adj}$ | <i>p</i> | <i>t</i>  | R    | P     |
| <b>Mean</b>  |          |             |          |           |      |       |
| PVC          | 0.728    | --          | 0.480    | 0.703     | --   | 0.495 |
| PFC          | 2.43     | .032        | 0.017    | 2.58      | .038 | 0.012 |
| PFC-PFC      | 0.883    | --          | 0.388    | 1.084     | --   | 0.293 |
| <b>SD</b>    |          |             |          |           |      |       |

|         |       |      |         |       |      |       |
|---------|-------|------|---------|-------|------|-------|
| PVC     | 5.91  | .216 | < .0001 | 1.72  | --   | 0.093 |
| PFC     | 5.64  | .200 | < .0001 | 0.747 | --   | 0.460 |
| PFC-PFC | -5.51 | .192 | < .0001 | -2.31 | .027 | 0.024 |

317

318 **Table 1.** Age effects on mean and standard deviation of univariate SM effects. SD = standard  
319 deviation.  $n=119$ .  $R^2_{adj}$  = the unbiased estimate of the amount of variance explained in the population.

320

321 If the increased activation in PFC reflected a compensatory PASA shift, we expected the  
322 multivariate analyses to show that this increased activity carried additional information about  
323 subsequent memory. However, the data revealed a different pattern. In MVB models, like  
324 other linear models with multiple predictors, each voxel within an ROI has a weight which  
325 captures the unique information it contributes (in this case, for predicting subsequent  
326 memory). Because both positive and negative weights carry information, we summarised the  
327 MVB results by the spread (standard deviation) of weights over voxels (see Materials and  
328 Methods).

329 In both ROIs, this spread was markedly reduced during later life (PVC: for linear effect of  
330 age,  $t(118) = -3.49$ ,  $p < .001$ ; for quadratic effect of age,  $t(118) = 3.50$ ,  $p < .001$ ; PFC: linear  
331  $t(118) = -3.34$ ,  $p < .001$ ; quadratic  $t(118) = -1.44$ ,  $p = .151$ ) (see Fig 2c and Table 2). This  
332 means that, contrary to a compensatory PASA shift, PFC showed fewer, rather than more,  
333 voxels with large positive or negative weights with increasing age. Moreover, direct  
334 comparison across ROIs showed that the age-related reduction in spread of weights was  
335 greater in PFC than PVC (linear  $t(118) = -2.02$ ,  $p = .044$ ). By contrast, the spread of  
336 univariate activities across voxels increased with age in both ROIs (Table 1).

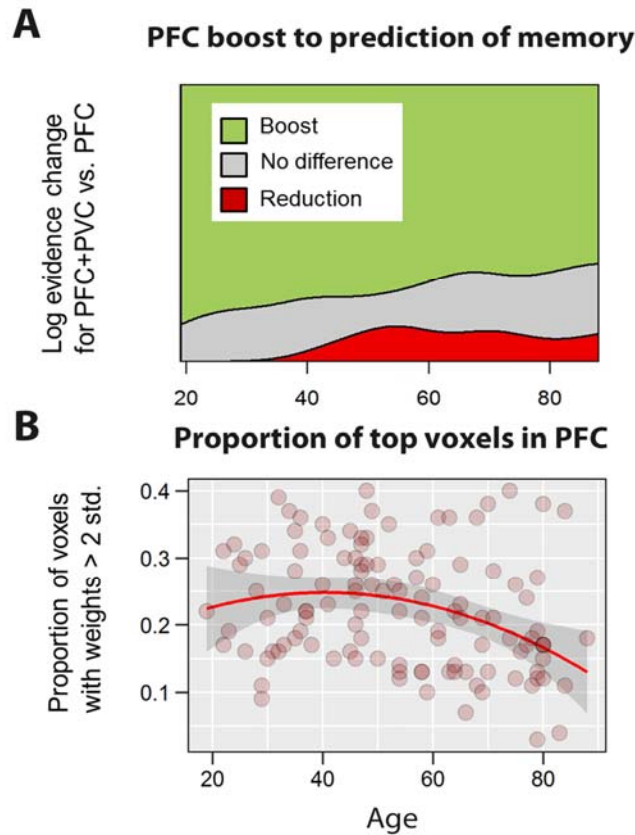

337

338 **Figure 3.** Evidence against a posterior-to-anterior shift from MVB comparisons between ROIs. **(a)**  
 339 Ordinal regression of Bayesian model comparison of combined PVC-PFC model versus PVC-only  
 340 model showed that a boost (difference in log-evidence > 3) for the combined model relative to the  
 341 PVC model was no more frequent with increasing age relative to no boost ( $-3 < \text{difference} < 3$ ) or a  
 342 reduction (difference < -3). **(b)** The proportion of top-weighted voxels (> 2 standard deviations above  
 343 mean) that fell within PFC (rather than PVC) showed an age-related reduction. The red line is a  
 344 robust-fitted second-order polynomial regression line and the shaded area shows 95% confidence  
 345 intervals.

346

| ROI/ measure | Linear   |          |          |          | Quadratic |          |
|--------------|----------|----------|----------|----------|-----------|----------|
|              | <i>t</i> | <i>r</i> | <i>p</i> | <i>T</i> | <i>r</i>  | <i>p</i> |
| <b>Mean</b>  |          |          |          |          |           |          |
| PVC          | -2.06    | .187     | .039     | 2.23     | .202      | .026     |
| PFC          | -.338    | --       | .732     | 1.88     | --        | .059     |
| PFC-PFC      | 1.09     | --       | .278     | -.196    | --        | .844     |
| <b>SD</b>    |          |          |          |          |           |          |

|         |       |      |       |       |      |       |
|---------|-------|------|-------|-------|------|-------|
| PVC     | -3.49 | .307 | <.001 | -3.50 | .308 | <.001 |
| PFC     | -3.33 | .294 | .001  | -1.44 | --   | .151  |
| PFC-PFC | -2.02 | .184 | .044  | .398  | --   | .690  |

347

348 **Table 2.** Age effects on mean and standard deviation of MVB voxel weights. SD = standard deviation.  
349 n=119.

350

351 To provide more direct tests for a posterior-to-anterior shift, we developed two measures of  
352 the relative contribution of PFC and PVC to subsequent memory after fitting joint MVB  
353 models that included both posterior and anterior ROIs. First, we used Bayesian model  
354 comparison in each participant to test whether adding PFC to the model – the joint PVC-PFC  
355 model – “boosted” prediction of subsequent memory relative to the PVC-only model (see  
356 Methods). Contrary to the PASA theory of a compensatory shift to greater reliance on PFC,  
357 a Bayes Factor comparing these two models revealed strong evidence for the null  
358 hypothesis of no boost (BF = 11.1); indeed, the probability of a boost to model evidence for  
359 PVC-PFC compared to PVC-only actually *decreased* with age numerically (Fig 3a; linear  
360  $t(118) = -1.54$ ,  $p = .064$ ). Second, we measured the proportion of top-weighted voxels (> 2  
361 standard deviations above the mean) in the joint PVC-PFC model that were located in PFC,  
362 as opposed to in PVC. However, this proportion significantly *decreased* with age (Fig 3b;  
363 linear  $t(118) = -3.31$ ,  $p = .00132$ ; quadratic  $t(118) = -1.99$ ,  $p = .0490$ ), again contrary to  
364 PASA.

## 365 Discussion

366 This study investigated the proposal that there is a posterior-to-anterior shift in task-related  
367 brain activity during aging, with a greater relative reliance on prefrontal cortex in older age.  
368 We tested predictions of this PASA theory with data from an episodic memory encoding task  
369 that was conducted on a relatively large population-derived adult lifespan sample. Using  
370 novel model-based multivariate analyses, we provide direct evidence against a posterior-to-  
371 anterior shift. Instead, our data suggest that increased PFC activity in older adults was less  
372 specific rather than compensatory, and that older adults relied *less* on prefrontal relative to  
373 posterior areas.

374 The results of the standard univariate activation analyses are consistent with previous  
375 studies showing age-related increases in activation in prefrontal cortex, which form the basis  
376 of the PASA theory (Grady et al., 1994; Davis et al., 2008). The increase was relatively  
377 modest, but generalizes previous findings in that it was reliable across lateral, anterior and

378 superior areas. Despite this, multivariate analysis showed that with increasing age, fewer  
379 voxels in each ROI strongly predicted subsequent memory. This negative effect of age on  
380 the spread of multivariate responses was accompanied by a positive effect on the spread of  
381 univariate activation responses across voxels. This, suggests that, while more voxels  
382 showed substantial (positive or negative) responses related to subsequent memory in older  
383 people, these additional responses were redundant, with fewer voxels contributing uniquely  
384 to memory encoding, as expected if increased prefrontal activity is less specific.

385 The notion of a posterior-to-anterior shift implies an age-related increase in PFC activity  
386 *relative* to posterior activity (Morcom and Johnson, 2015). Direct comparisons have not  
387 generally been made, but evidence for a shift comes from findings of cross-over effects in  
388 which age-related decreases in posterior cortical activity occur alongside age-related  
389 increases in PFC (e.g., Grady et al., 1994; Davis et al., 2008). Numerous other studies have  
390 focused on age-related increases in PFC rather than a shift relative from posterior cortex  
391 (e.g., Cabeza et al., 1997; Anderson et al., 2000). A recent meta-analysis of subsequent  
392 memory effects supported PASA, with age-related increases in older adults in several PFC  
393 regions (Maillet and Rajah, 2014), and decreases in PVC, although another meta-analysis  
394 across different tasks found age-related decreases as well as increases in different PFC  
395 regions (Spreng et al., 2010). In individual studies, neighbouring areas of PVC (Grady et al.,  
396 1994) and PFC (Rajah and D'Esposito, 2005) can also show both age-related increases and  
397 decreases. A strength of our approach is that our multivariate analyses encompassed large  
398 ROIs in both anterior and posterior cortices, as well as direct comparisons between the two.

399 The univariate activation analyses showed no evidence of a posterior-to-anterior shift, as  
400 age effects in PFC and PVC did not differ. However, the reduction in multivariate responses  
401 predicting subsequent memory was more pronounced in PFC than PVC. Together with the  
402 evidence that the activity was less specific, this implicates age-related effects in both regions  
403 which impact PFC to a greater degree, consistent with evidence from structural studies  
404 (West, 1996; Raz and Rodrigue, 2006). One mechanism by which deleterious changes can  
405 give rise to increased activity may be a pervasive dedifferentiation of neuronal  
406 representations, which predominantly affects complex cognitive functions (Li et al., 2001;  
407 Park et al., 2004; Carp et al., 2011; Abdulrahman et al., 2014). Alternatively, processing may  
408 become less efficient, providing less computational “bang for the buck” for the same level of  
409 neural activity (Rypma and Esposito, 2000; Morcom et al., 2007; Grady, 2008; Reuter-  
410 Lorenz and Campbell, 2008; Nyberg et al., 2014). According to these theories, increased  
411 activation in older adults reflects loss of neuronal integrity rather than compensation.

412 The PASA theory proposes that PFC is not only engaged to a greater degree in older adults  
413 but that the additional activity also compensates, i.e., helps to maintain cognitive function.  
414 Unique insights are therefore to be gained from joint analysis of the contributions of anterior  
415 and posterior regions. Using multivariate models of both PFC and PVC, we constructed two  
416 novel measures of the degree to which unique information about subsequent memory was  
417 carried by PFC: 1) A direct model comparison showed that PFC did not contribute more to  
418 subsequent memory with increasing age, over and above the contribution of PVC, while a  
419 direct comparison of the number of influential voxels failed to support the hypothesis that  
420 PFC plays a stronger role with increasing age. On the contrary, we found that fewer of the  
421 voxels most strongly predicting subsequent memory were located in PFC relative to PVC in  
422 older adults.

423 Our data replicate a (modest) increase in PFC activity over the adult lifespan, but do not  
424 support the idea that this reflects a compensatory posterior-to-anterior shift, at least in the  
425 context of memory encoding. The results are most parsimoniously explained by reduced  
426 specificity of neural responses reflecting primary age-related deleterious changes leading to  
427 dedifferentiation or inefficient neural computation. Our results therefore help to adjudicate  
428 between two main competing accounts of neurocognitive aging, while also illustrating the  
429 ability of MVB to compare models that comprise different sets of voxels, thereby offering an  
430 exciting new general way to test the relative contributions of brain regions to cognitive  
431 outcomes.

#### 432 Acknowledgments

433

434 A.M.M. is a member of the University of Edinburgh Centre for Cognitive Ageing and  
435 Cognitive Epidemiology (CCACE), part of the UK cross-council Lifelong Health and  
436 Wellbeing Initiative, Grant number G0700704/84698. The Cambridge Centre for Ageing and  
437 Neuroscience (Cam-CAN) research was supported by the Biotechnology and Biological  
438 Sciences Research Council (grant number BB/H008217/1). The full Cam-CAN author list  
439 can be found here: <http://www.cam-can.org/index.php?content=corpauth>. R.N.A.H. is funded  
440 by the Medical Research Council (MC\_A060\_5PR10).

#### 441 Author contributions

442

443 A.M.M. and R.N.A.H. designed research; A.M.M., R.N.A.H. and Cam-CAN performed  
444 research; A.M.M. and R.N.A.H. analyzed data; A.M.M. and R.N.A.H. wrote the paper.

#### 445 References

446 Abdulrahman H, Fletcher PC, Bullmore E, Morcom AM (2014) Dopamine and memory  
447 dedifferentiation in aging. *Neuroimage*.



- 448 Anderson ND, Lidaka T, Cabeza R, Kapur S, McIntosh A R, Craik FI (2000) The effects of  
449 divided attention on encoding- and retrieval-related brain activity: A PET study of  
450 younger and older adults. *J Cogn Neurosci* 12:775–792.
- 451 Ashburner J (2007) A fast diffeomorphic image registration algorithm. 38:95–113.
- 452 Cabeza R, McIntosh AR, Tulving E, Nyberg L, Grady CL (1997) Age-related differences in  
453 effective neural connectivity during encoding and recall. *Neuroreport* 8:3479–3483  
454 Available at:  
455 <http://www.biomednet.com/db/medline/98087183%5Cnhttp://graphics.tx.ovid.com/ovftpd fs/FPDDNCOBFAOJIC00/fs041/ovft/live/gv012/00001756/00001756-199711100-00013.pdf>.  
457
- 458 Carp J, Park J, Polk TA, Park DC (2011) Age differences in neural distinctiveness revealed  
459 by multi-voxel pattern analysis. *Neuroimage* 56:736–743 Available at:  
460 <http://dx.doi.org/10.1016/j.neuroimage.2010.04.267>.
- 461 Chadwick MJ, Bonnici HM, Maguire E a. (2014) CA3 size predicts the precision of memory  
462 recall. *Proc Natl Acad Sci* 111:10720–10725 Available at:  
463 <http://www.pubmedcentral.nih.gov/articlerender.fcgi?artid=4115494&tool=pmcentrez&rendertype=abstract>.  
464
- 465 Davis SW, Dennis NA, Daselaar SM, Fleck MS, Cabeza R (2008) Que PASA? the posterior-  
466 anterior shift in aging. *Cereb Cortex* 18:1201–1209.
- 467 Dienes Z (2014) Using Bayes to get the most out of non-significant results. *Front Psychol*  
468 5:1–17.
- 469 Friston K, Chu C, Mour??o-Miranda J, Hulme O, Rees G, Penny W, Ashburner J (2008)  
470 Bayesian decoding of brain images. *Neuroimage* 39:181–205.
- 471 Friston K, Mattout J, Trujillo-Barreto N, Ashburner J, Penny W (2007) Variational free energy  
472 and the Laplace approximation. *Neuroimage* 34:220–234.
- 473 Grady C (2012) The cognitive neuroscience of ageing. *Nat Rev Neurosci* 13:491–505  
474 Available at: <http://www.ncbi.nlm.nih.gov/pubmed/22714020>.
- 475 Grady CL (2008) Cognitive neuroscience of aging. *Ann N Y Acad Sci* 1124:127–144.
- 476 Grady CL, Maisog JM, Horwitz B, Ungerleider LG, Mentis MJ, Salerno JA, Pietrini P, Wagner  
477 E, Haxby J V (1994) Age-related changes in cortical blood flow activation during visual  
478 processing of faces and location. *J Neurosci* 14:1450–1462.
- 479 Henson RN et al. (2016) Multiple determinants of lifespan memory differences. *Sci Rep*  
480 6:32527 Available at: <http://www.nature.com/articles/srep32527>.
- 481 Hulme OJ, Skov M, Chadwick MJ, Siebner HR, Rams??y TZ (2014) Sparse encoding of  
482 automatic visual association in hippocampal networks. *Neuroimage* 102:458–464  
483 Available at: <http://dx.doi.org/10.1016/j.neuroimage.2014.07.020>.
- 484 Lancaster JL, Woldorff MG, Parsons LM, Liotti M, Freitas CS, Rainey L, Kochunov P V.,  
485 Nickerson D, Mikiten SA, Fox PT (2000) Automated Talairach Atlas labels for functional  
486 brain mapping. *Hum Brain Mapp* 10:120–131.
- 487 Lang PJ, Bradley MM, Cuthbert BN (1997) International Affective Picture System (IAPS):  
488 Technical Manual and Affective Ratings. NIMH Cent Study Emot Atten:39–58 Available  
489 at:  
490 <http://www.unifesp.br/dpsicobio/adap/instructions.pdf%5Cnhttp://econtent.hogrefe.com/>

- 491           doi/abs/10.1027/0269-8803/a000147.
- 492   Li S-C, Li S-C, Lindenberger U, Lindenberger U, Sikstrom S, Sikstrom S (2001) Aging  
493   cognition: From neuromodulation to representation. 5:479–486.
- 494   Maass A, Schütze H, Speck O, Yonelinas A, Tempelmann C, Heinze H-J, Berron D,  
495   Cardenas-Blanco A, Brodersen KH, Enno Stephan K, Düzel E (2014) Laminar activity  
496   in the hippocampus and entorhinal cortex related to novelty and episodic encoding. *Nat*  
497   *Commun* 5:5547 Available at:  
498   <http://www.nature.com/doi/abs/10.1038/ncomms6547>  
499   <http://www.pubmedcentral.nih.gov/articlerender.fcgi?artid=4263140&tool=pmcentrez&rendertype=abstract>.
- 500   Maillet D, Rajah MN (2014) Age-related differences in brain activity in the subsequent  
501   memory paradigm: A meta-analysis. *Neurosci Biobehav Rev* 45:246–257 Available at:  
502   <http://dx.doi.org/10.1016/j.neubiorev.2014.06.006>.
- 503   Maldjian JA, Laurienti PJ, Kraft RA, Burdette JH (2003) An automated method for  
504   neuroanatomic and cytoarchitectonic atlas-based interrogation of fMRI data sets.  
505   *Neuroimage* 19:1233–1239.
- 506   Morcom AM, Friston KJ (2012) Decoding episodic memory in ageing: A Bayesian analysis of  
507   activity patterns predicting memory. *Neuroimage* 59.
- 508   Morcom AM, Good CD, Frackowiak RSJ, Rugg MD (2003) Age effects on the neural  
509   correlates of successful memory encoding. *Brain* 126.
- 510   Morcom AM, Johnson W (2015) Neural reorganization and compensation in aging. *J Cogn*  
511   *Neurosci* 27.
- 512   Morcom AM, Li J, Rugg MD (2007) Age effects on the neural correlates of episodic retrieval:  
513   Increased cortical recruitment with matched performance. *Cereb Cortex* 17.
- 514   Nyberg L, Andersson M, Kauppi K, Lundquist A, Persson J, Pudas S, Nilsson LG (2014)  
515   Age-related and genetic modulation of frontal cortex efficiency. *J Cogn Neurosci*  
516   26:746–764.
- 517   Nyberg L, Lundquist A, Riklund K, Lindenberger U, Bäckman L (2012) Memory aging and  
518   brain maintenance. *Trends Cogn Sci* 16:292–305.
- 519   Park DC, Polk TA, Park R, Minear M, Savage A, Smith MR (2004) Aging reduces neural  
520   specialization in ventral visual cortex. 101:13091–13095.
- 521   Park DC, Reuter-Lorenz P (2009) The adaptive brain: aging and neurocognitive scaffolding.  
522   *Annu Rev Psychol* 60:173–196 Available at:  
523   <http://www.ncbi.nlm.nih.gov/pubmed/19035823>.
- 524   Rajah MN, D'Esposito M (2005) Region-specific changes in prefrontal function with age: A  
525   review of PET and fMRI studies on working and episodic memory. *Brain* 128:1964–  
526   1983.
- 527   Raz N, Rodrigue KM (2006) Differential aging of the brain: Patterns, cognitive correlates and  
528   modifiers. *Neurosci Biobehav Rev* 30:730–748.
- 529   Reuter-Lorenz PA, Campbell KA (2008) Neurocognitive ageing and the Compensation  
530   Hypothesis. *Curr Dir Psychol Sci* 17:177–182.
- 531   Rouder JN, Speckman PL, Sun D, Morey RD, Iverson G (2009) Bayesian t tests for  
532   accepting and rejecting the null hypothesis. *Psychon Bull Rev* 16:225–237.

- 533 Rypma B, Esposito MD (2000) Isolating the neural mechanisms of age-related changes in  
534 human working memory. *3:509–515*.
- 535 Shafto M a, Tyler LK, Dixon M, Taylor JR, Rowe JB, Cusack R, Calder AJ, Marslen-Wilson  
536 WD, Duncan J, Dalgleish T, Henson RN, Brayne C, Matthews FE (2014) The  
537 Cambridge Centre for Ageing and Neuroscience (Cam-CAN) study protocol: a cross-  
538 sectional, lifespan, multidisciplinary examination of healthy cognitive ageing. *BMC*  
539 *Neurol* 14:204 Available at:  
540 [http://www.pubmedcentral.nih.gov/articlerender.fcgi?artid=4219118&tool=pmcentrez&re](http://www.pubmedcentral.nih.gov/articlerender.fcgi?artid=4219118&tool=pmcentrez&rendertype=abstract)  
541 [ndertype=abstract](http://www.pubmedcentral.nih.gov/articlerender.fcgi?artid=4219118&tool=pmcentrez&rendertype=abstract).
- 542 Smith APR, Henson RNA, Dolan RJ, Rugg MD (2004) fMRI correlates of the episodic  
543 retrieval of emotional contexts. *Neuroimage* 22:868–878.
- 544 Spreng RN, Wojtowicz M, Grady CL (2010) Reliable differences in brain activity between  
545 young and old adults: A quantitative meta-analysis across multiple cognitive domains.  
546 *Neurosci Biobehav Rev* 34:1178–1194 Available at:  
547 <http://dx.doi.org/10.1016/j.neubiorev.2010.01.009>.
- 548 Taylor JR, Williams N, Cusack R, Auer T, Shafto MA, Dixon M, Tyler LK, Cam-CAN X,  
549 Henson RN (2015) The Cambridge Centre for Ageing and Neuroscience (Cam-CAN)  
550 data repository: Structural and functional MRI, MEG, and cognitive data from a cross-  
551 sectional adult lifespan sample. *Neuroimage* 144:262–269 Available at:  
552 <http://dx.doi.org/10.1016/j.neuroimage.2015.09.018>.
- 553 Tzourio-Mazoyer N, Landeau B, Papathanassiou D, Crivello F, Etard O, Delcroix N, Mazoyer  
554 B, Joliot M (2002) Automated anatomical labeling of activations in SPM using a  
555 macroscopic anatomical parcellation of the MNI MRI single-subject brain. *Neuroimage*  
556 15:273–289.
- 557 Venables WN (William N., Ripley BD, Venables WN (William N). (2002) Modern applied  
558 statistics with S.
- 559 Wagenmakers E-J (2007) A practical solution to the pervasive problems of p values.  
560 14:779–804.
- 561 West RL (1996) An application of prefrontal cortex function theory to cognitive aging.  
562 *Psychol Bull* 120:272–292.

563

## 564 Figures and Figure legends

565 **Figure 1**

566 **Figure 2**

567

568 **Figure 3**

569

## 570 Tables and Table legends

571 **Table 1**

572 **Table 2**

573

574

575
